# Supplementary material for: One-step fabrication of CuO-doped TiO2 nanotubes enhanced the catalytic activity of Pt nanoparticles towards the methanol oxidation reaction in acid media
Source: Royal Society of Chemistry journal article supplement (doi:10.1039/d1nj00095k), 2021-01-01
Supplement: d1nj00095k1.pdf [file d1nj00095k1.pdf]

## Supporting Information

**One-step fabrication of CuO-doped TiO<sub>2</sub> nanotubes enhanced the catalytic activity of Pt nanoparticles towards methanol oxidation reaction in acid media**

*Qinglan Fu, Mengyu Gan\* , Li Ma\* , Shuang Wei, Taichun Wu, Yanling Yang, Tingting Li, Wang Zhan, Fei Xie, Xiujuan Zhong*

*College of Chemistry & Chemical Engineering, Chongqing University, Chongqing 400044, P. R. China*

*\*1Corresponding author. E-mail address: mlsys404@126.com.*

*\*2Corresponding author. E-mail address: mlsys607@126.com.*

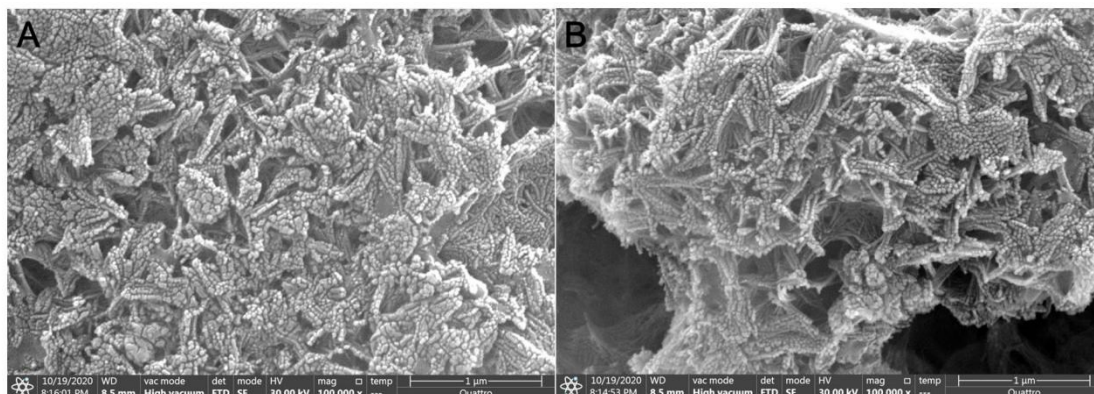

Fig.S1 Representative SEM images of the  $\text{TiO}_2/\text{CuO}$  nanotubes.

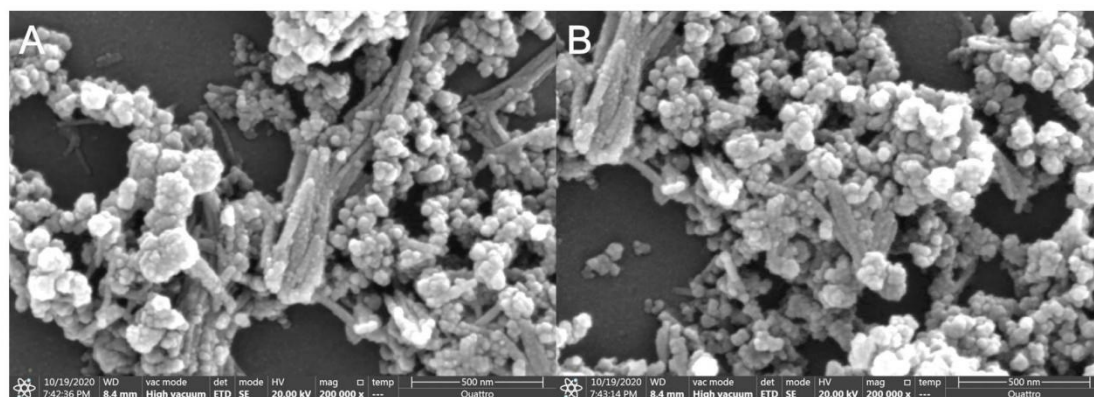

Fig.S2 Representative SEM images of the  $\text{Pt}/\text{CuO}/\text{TiO}_2/\text{C}$  hybrid material.

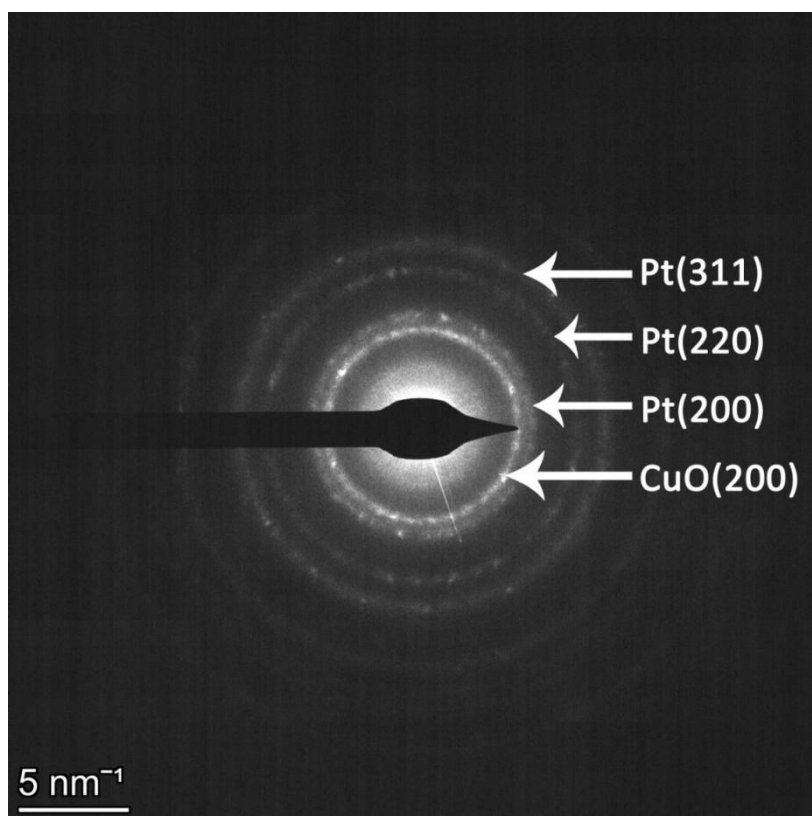

Fig.S3 SAED image of the Pt/CuO/TiO<sub>2</sub>/C.

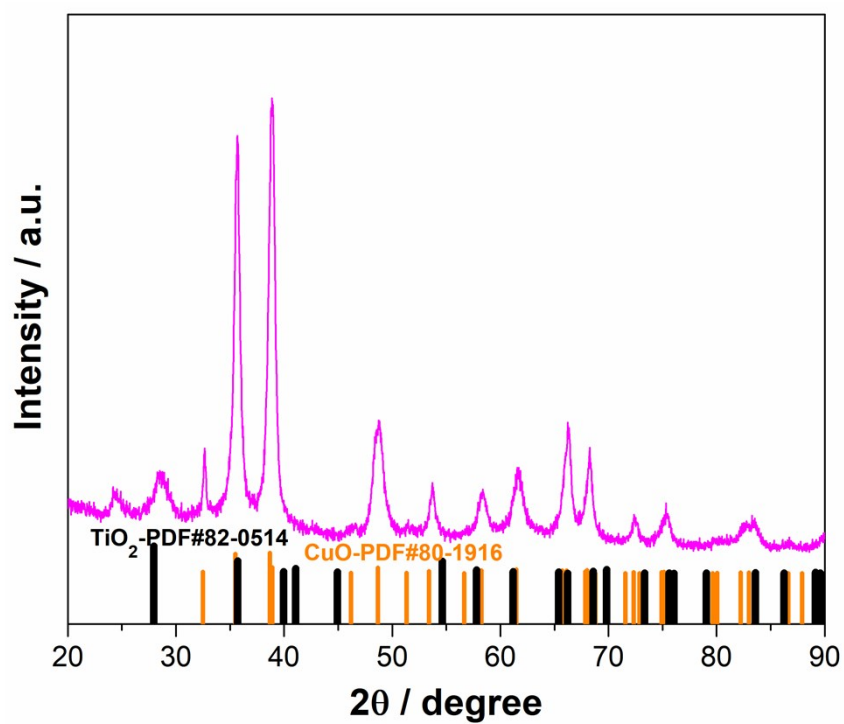

Fig.S4 The XRD pattern of the TiO<sub>2</sub>-CuO nanotubes that treated with NaOH solution.
